# Supplementary material for: HJURP Promotes Epithelial-to-Mesenchymal Transition via Upregulating SPHK1 in Hepatocellular Carcinoma
Source: PubMed Central journal article supplement — Int J Biol Sci. 2019 May 7;15(6):1139–47. doi: 10.7150/ijbs.30904 (PMC6567799; doi:10.7150/ijbs.30904), 2019-05-07
Supplement: ijbsv15p1139s1.pdf [file ijbsv15p1139s1.pdf]

Figure S1

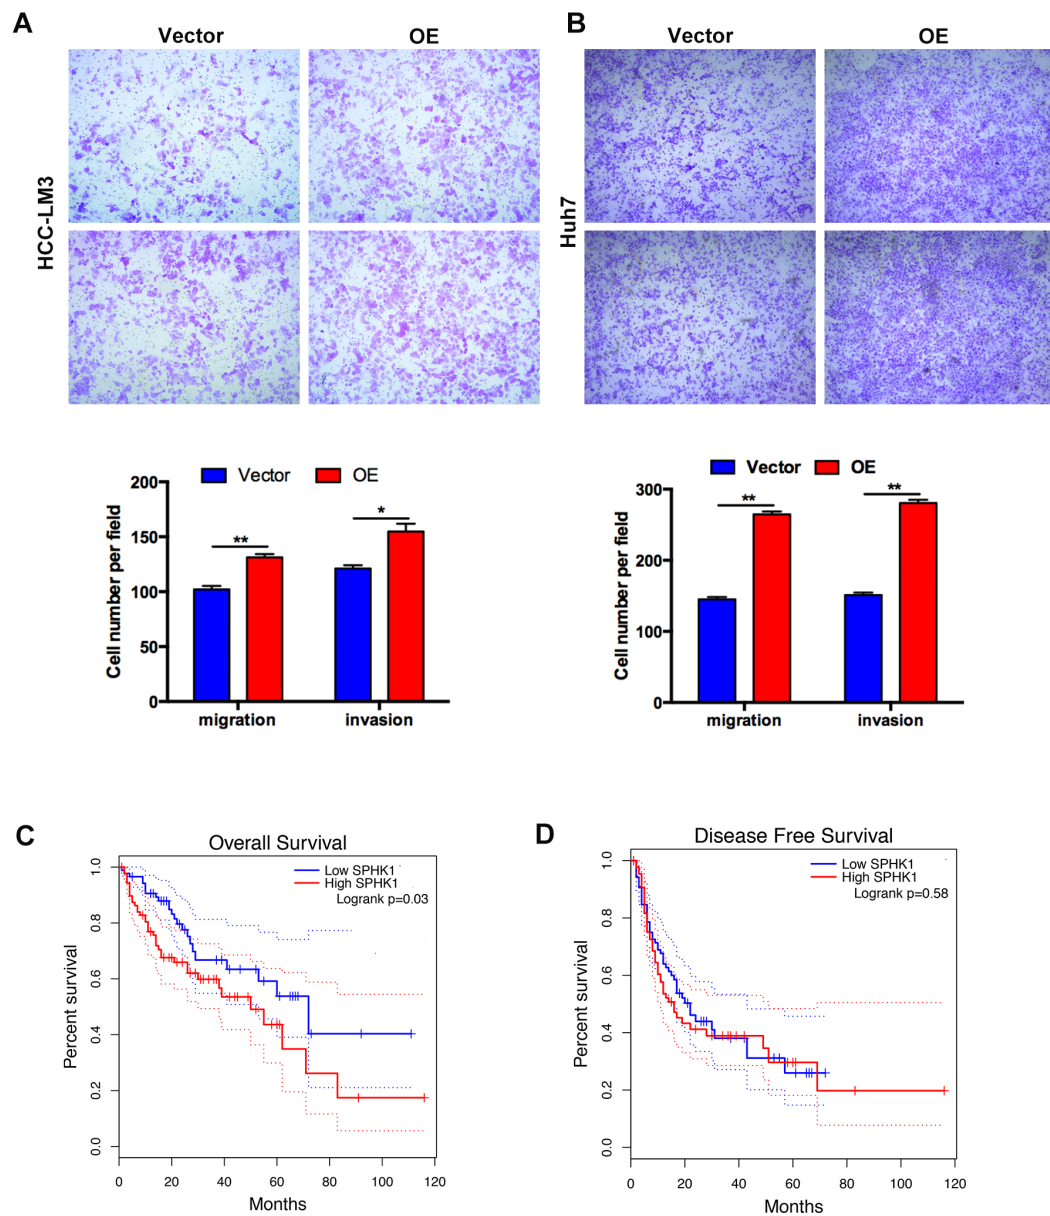

**Supplementary Figure 1.** The invasion and migration abilities of HCC-LM3 (A) and Huh7 (B) cells were significantly decreased in HJURP-overexpression group (OE) compared to the control group (Vector). Overall survival rate (C) and disease-free survival rate (D) of HCC patients classified by SPHK1 expression.
